# Supplementary material for: Historical Isolation of the Galápagos Carpenter Bee (Xylocopa darwini) despite Strong Flight Capability and Ecological Amplitude
Source: PubMed Central journal article supplement (PMC4373804; doi:10.1371/journal.pone.0120597), 2015-03-25

# Historical isolation of the Galápagos carpenter bee (*Xylocopa darwini*) despite strong flight capability and ecological amplitude

Pablo Vargas<sup>1¶</sup>, Beatriz Rumeu<sup>1¶</sup>, Ruben H. Heleno<sup>2</sup>, Anna Traveset<sup>3</sup>, Manuel Nogales<sup>4</sup>

## Electronic supplementary material (ESM)

**Figure S1. Bayesian Inference (BI) analysis showing main clades of *COII* sequences of *X. darwini*.** The BI was implemented in MrBayes 3.1.2 [21] using a HKY+I model for two searches with 10 million generations each and a sample frequency of 1,000. Chain convergence was assessed with Tracer 1.5 [22], and a 50% majority rule consensus tree with Bayesian posterior probabilities (PP) of clades was calculated to obtain the Bayesian estimate of phylogeny after removing the first 25% generations as burn-in.

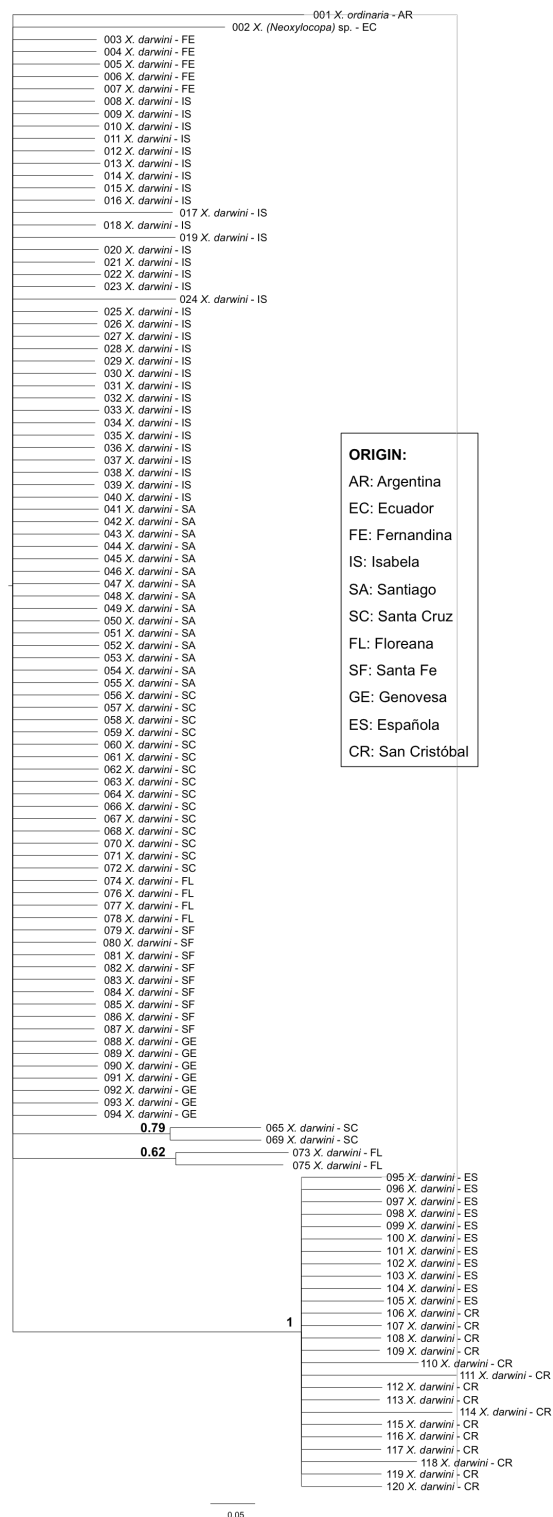

Supplement: pone.0120597.s001.pdf [file pone.0120597.s001.pdf]
