# Supplementary material for: Historical Isolation of the Galápagos Carpenter Bee (Xylocopa darwini) despite Strong Flight Capability and Ecological Amplitude
Source: PubMed Central journal article supplement (PMC4373804; doi:10.1371/journal.pone.0120597), 2015-03-25
Supplement: pone.0120597.s003.pdf [file pone.0120597.s003.pdf]

## Historical isolation of the Galápagos carpenter bee (*Xylocopa darwini*) despite strong flight capability and ecological amplitude

Pablo Vargas<sup>1</sup>, Beatriz Rumeu<sup>1</sup>, Ruben H. Heleno<sup>2</sup>, Anna Traveset<sup>3</sup>, Manuel Nogales<sup>4</sup>

### Electronic supplementary material (ESM)

**Table S1.** Sampling details of the *Xylocopa* specimens sequenced for the mitochondrial *cytochrome oxidase II* (*COII*). Codes as in Figure 2. GenBank accession numbers are shown for each bee. h: haplotypes found according to Figure 1.

| No | CODE- voucher                | Taxa                        | ISLAND     | Locality                            | Zone       | Plant/habitat where collected           | Date          | GenBank accession number | h |
|----|------------------------------|-----------------------------|------------|-------------------------------------|------------|-----------------------------------------|---------------|--------------------------|---|
| 01 | 63PV11 (leg. Andrea Coccuci) | <i>X. ordinaria</i>         |            | Argentina, Córdoba, Colón           | –          | –                                       | 12.02.2011    | KM266466                 | 1 |
| 02 | 15PV11                       | <i>X. (Neoxylocopa)</i> sp. |            | Ecuador, Guayas, Puerto López       | –          | –                                       | 7.02.2011     | KM266467                 | 2 |
| 03 | 21PV10                       | <i>X. darwini</i>           | Fernandina | Cabo Douglas                        | Dry        | Flying                                  | 11.02.2010    | KM266468                 | 3 |
| 04 | 22PV10                       | <i>X. darwini</i>           | Fernandina | Cabo Douglas                        | Dry        | <i>Waltheria ovata</i>                  | 11.02.2010    | KM266469                 | 3 |
| 05 | 24PV10                       | <i>X. darwini</i>           | Fernandina | Cabo Douglas                        | Dry        | <i>Waltheria ovata</i>                  | 11.02.2010    | KM266470                 | 3 |
| 06 | 25PV10                       | <i>X. darwini</i>           | Fernandina | Cabo Douglas                        | Dry        | <i>Waltheria ovata</i>                  | 12.02.2010    | KM266471                 | 3 |
| 07 | 19trisPV11                   | <i>X. darwini</i>           | Fernandina | Cabo Douglas                        | Dry        | –                                       | 14.02.2011    | KM266472                 | 4 |
| 08 | 18PV11(1)                    | <i>X. darwini</i>           | Isabela    | Playa Tortuga Negra (Volcán Darwin) | Dry        | <i>Lycopersicum, Galvezia leucantha</i> | 14.02.2011    | KM266473                 | 4 |
| 09 | 18PV11(2)                    | <i>X. darwini</i>           | Isabela    | Playa Tortuga Negra (Volcán Darwin) | Dry        | <i>Lycopersicum, Galvezia leucantha</i> | 14.02.2011    | KM266474                 | 5 |
| 10 | 115PV11(1)                   | <i>X. darwini</i>           | Isabela    | Volcán Alcedo, Pega Pega            | Transition | Flying                                  | April - 2001  | KM266475                 | 3 |
| 11 | 116PV11                      | <i>X. darwini</i>           | Isabela    | Volcán Alcedo                       | Humid      | Flying                                  | October-2001  | KM266476                 | 4 |
| 12 | 120PV11(1)                   | <i>X. darwini</i>           | Isabela    | Sierra Negra, agricultural area     | Humid      | Flying                                  | 14.03.2011    | KM266477                 | 4 |
| 13 | 120PV11(2)                   | <i>X. darwini</i>           | Isabela    | Sierra Negra, agricultural area     | Humid      | Flying                                  | 14.03.2011    | KM266478                 | 3 |
| 14 | 121PV11(1)                   | <i>X. darwini</i>           | Isabela    | Sierra Negra, Muro de las Lágrimas  | Dry        | Flying                                  | March - 2011  | KM266479                 | 4 |
| 15 | 121PV11(2)                   | <i>X. darwini</i>           | Isabela    | Sierra Negra, Muro de las Lágrimas  | Dry        | Flying                                  | March - 2011  | KM266480                 | 4 |
| 16 | 121PV11(3)                   | <i>X. darwini</i>           | Isabela    | Sierra Negra, Muro de las Lágrimas  | Dry        | Flying                                  | March - 2011  | KM266481                 | 4 |
| 17 | 122PV11(1)                   | <i>X. darwini</i>           | Isabela    | Sierra Negra, Puerto Villamil       | Dry        | Flying                                  | 15.03.2011    | KM266482                 | 6 |
| 18 | 122PV11(2)                   | <i>X. darwini</i>           | Isabela    | Sierra Negra, Puerto Villamil       | Dry        | Flying                                  | 15.03.2011    | KM266483                 | 4 |
| 19 | 122PV11(3)                   | <i>X. darwini</i>           | Isabela    | Sierra Negra, Puerto Villamil       | Dry        | Flying                                  | 15.03.2011    | KM266484                 | 7 |
| 20 | 122PV11(4)                   | <i>X. darwini</i>           | Isabela    | Sierra Negra, Puerto Villamil       | Dry        | Flying                                  | 15.03.2011    | KM266485                 | 5 |
| 21 | 122PV11(5)                   | <i>X. darwini</i>           | Isabela    | Sierra Negra, Puerto Villamil       | Dry        | Flying                                  | 15.03.2011    | KM266486                 | 3 |
| 22 | 123PV11                      | <i>X. darwini</i>           | Isabela    | Volcán Wolf                         | 30-750m    | Flying                                  | 14-17.03.2011 | KM266487                 | 5 |

|    |             |                   |            |                                     |         |                                                                                                                                                |               |          |   |
|----|-------------|-------------------|------------|-------------------------------------|---------|------------------------------------------------------------------------------------------------------------------------------------------------|---------------|----------|---|
| 23 | 123PV11(2)  | <i>X. darwini</i> | Isabela    | Volcán Wolf                         | 30-750m | Flying                                                                                                                                         | 14-17.03.2011 | KM266488 | 4 |
| 24 | 123PV11(3)  | <i>X. darwini</i> | Isabela    | Volcán Wolf                         | 30-750m | Flying                                                                                                                                         | 14-17.03.2011 | KM266489 | 8 |
| 25 | 123PV11(4)  | <i>X. darwini</i> | Isabela    | Volcán Wolf                         | 30-750m | Flying                                                                                                                                         | 14-17.03.2011 | KM266490 | 3 |
| 26 | 123PV11(5)  | <i>X. darwini</i> | Isabela    | Volcán Wolf                         | 30-750m | Flying                                                                                                                                         | 14-17.03.2011 | KM266491 | 3 |
| 27 | 123PV11(6)  | <i>X. darwini</i> | Isabela    | Volcán Wolf                         | 30-750m | Flying                                                                                                                                         | 14-17.03.2011 | KM266492 | 3 |
| 28 | 123PV11(7)  | <i>X. darwini</i> | Isabela    | Volcán Wolf                         | 30-750m | Flying                                                                                                                                         | 14-17.03.2011 | KM266493 | 5 |
| 29 | 123PV11(8)  | <i>X. darwini</i> | Isabela    | Volcán Wolf                         | 30-750m | Flying                                                                                                                                         | 14-17.03.2011 | KM266494 | 4 |
| 30 | 123PV11(9)  | <i>X. darwini</i> | Isabela    | Volcán Wolf                         | 30-750m | Flying                                                                                                                                         | 14-17.03.2011 | KM266495 | 3 |
| 31 | 124PV11(1)  | <i>X. darwini</i> | Isabela    | Volcán Ecuador                      | 0-550m  | Flying                                                                                                                                         | 18-19.03.2011 | KM266496 | 4 |
| 32 | 124PV11(2)  | <i>X. darwini</i> | Isabela    | Volcán Ecuador                      | 0-550m  | Flying                                                                                                                                         | 18-19.03.2011 | KM266497 | 4 |
| 33 | 124PV11(3)  | <i>X. darwini</i> | Isabela    | Volcán Ecuador                      | 0-550m  | Flying                                                                                                                                         | 18-19.03.2011 | KM266498 | 5 |
| 34 | 124PV11(4)  | <i>X. darwini</i> | Isabela    | Volcán Ecuador                      | 0-550m  | Flying                                                                                                                                         | 18-19.03.2011 | KM266499 | 4 |
| 35 | 124PV11(5)  | <i>X. darwini</i> | Isabela    | Volcán Ecuador                      | 0-550m  | Flying                                                                                                                                         | 18-19.03.2011 | KM266500 | 4 |
| 36 | 124PV11(6)  | <i>X. darwini</i> | Isabela    | Volcán Ecuador                      | 0-550m  | Flying                                                                                                                                         | 18-19.03.2011 | KM266501 | 4 |
| 37 | 124PV11(7)  | <i>X. darwini</i> | Isabela    | Volcán Ecuador                      | 0-550m  | Flying                                                                                                                                         | 18-19.03.2011 | KM266502 | 3 |
| 38 | 124PV11(8)  | <i>X. darwini</i> | Isabela    | Volcán Ecuador                      | 0-550m  | Flying                                                                                                                                         | 18-19.03.2011 | KM266503 | 3 |
| 39 | 124PV11(9)  | <i>X. darwini</i> | Isabela    | Volcán Ecuador                      | 0-550m  | Flying                                                                                                                                         | 18-19.03.2011 | KM266504 | 4 |
| 40 | 124PV11(10) | <i>X. darwini</i> | Isabela    | Volcán Ecuador                      | 0-550m  | Flying                                                                                                                                         | 18-19.03.2011 | KM266505 | 5 |
| 41 | 26PV10      | <i>X. darwini</i> | Santiago   | Bahía James, Cerro rojo             | Dry     | Flying                                                                                                                                         | 17.02.2010    | KM266506 | 3 |
| 42 | 26PV10(2)   | <i>X. darwini</i> | Santiago   | Bahía James, Cerro rojo             | Dry     | Flying                                                                                                                                         | 17.02.2010    | KM266507 | 3 |
| 43 | 26PV10(3)   | <i>X. darwini</i> | Santiago   | Bahía James, Cerro rojo             | Dry     | Flying                                                                                                                                         | 17.02.2010    | KM266508 | 3 |
| 44 | 28PV10      | <i>X. darwini</i> | Santiago   | Bahía Ladilla, Cerro colorado       | Dry     | <i>Waltheria ovata</i>                                                                                                                         | 18.02.2010    | KM266509 | 3 |
| 45 | 30PV10      | <i>X. darwini</i> | Santiago   | Bahía James                         | Dry     | Flying                                                                                                                                         | 18.02.2010    | KM266510 | 3 |
| 46 | 31PV10      | <i>X. darwini</i> | Santiago   | Bahía James                         | Dry     | <i>Tamarindus indica</i>                                                                                                                       | 19.02.2010    | KM266511 | 3 |
| 47 | 31PV10(2)   | <i>X. darwini</i> | Santiago   | Bahía James                         | Dry     | <i>Tamarindus indica</i>                                                                                                                       | 19.02.2010    | KM266512 | 3 |
| 48 | 31PV10(3)   | <i>X. darwini</i> | Santiago   | Bahía James                         | Dry     | <i>Tamarindus indica</i>                                                                                                                       | 19.02.2010    | KM266513 | 3 |
| 49 | 31PV10(4)   | <i>X. darwini</i> | Santiago   | Bahía James                         | Dry     | <i>Tamarindus indica</i>                                                                                                                       | 19.02.2010    | KM266514 | 3 |
| 50 | 31PV10(5)   | <i>X. darwini</i> | Santiago   | Bahía James                         | Dry     | <i>Tamarindus indica</i>                                                                                                                       | 19.02.2010    | KM266515 | 3 |
| 51 | 22PV11      | <i>X. darwini</i> | Santiago   | Bahía James, Cerro rojo             | Dry     | <i>Galvezia</i>                                                                                                                                | 19.02.2011    | KM266516 | 3 |
| 52 | 23PV11(1)   | <i>X. darwini</i> | Santiago   | Bahía James – Puerto Egas           | Dry     | <i>Cordia leucophlyctis</i>                                                                                                                    | 19.02.2010    | KM266517 | 3 |
| 53 | 23PV11(2)   | <i>X. darwini</i> | Santiago   | Bahía James – Puerto Egas           | Dry     | <i>Cordia psyllostachya</i>                                                                                                                    | 19.02.2010    | KM266518 | 3 |
| 54 | 23PV11(3)   | <i>X. darwini</i> | Santiago   | Bahía James– Puerto Egas            | Dry     | <i>Cordia psyllostachya</i>                                                                                                                    | 19.02.2010    | KM266519 | 3 |
| 55 | 23PV11(4)   | <i>X. darwini</i> | Santiago   | Bahía James – Puerto Egas           | Dry     | <i>Cordia psyllostachya</i>                                                                                                                    | 19.02.2010    | KM266520 | 3 |
| 56 | 33PV10      | <i>X. darwini</i> | Santa Cruz | Charles Darwin Foundation (CDF)     | Dry     | <i>Tribulus</i>                                                                                                                                | 20.02.2010    | KM266521 | 3 |
| 57 | 33PV10(2)   | <i>X. darwini</i> | Santa Cruz | CDF                                 | Dry     | <i>Tribulus</i>                                                                                                                                | 20.02.2010    | KM266522 | 3 |
| 58 | 34PV10      | <i>X. darwini</i> | Santa Cruz | Granillo Rojo (Baltra-Puerto Ayora) | Humid   | <i>Scalesia pedunculata</i> ,<br><i>Anoda acerifolia</i> ,<br><i>Alternanthera</i><br><i>echinocephala</i> , <i>Sida</i><br><i>rhombifolia</i> | 20.02.2010    | KM266523 | 3 |

|    |           |                   |            |                                     |       |                                                                                                                                                |            |          |    |
|----|-----------|-------------------|------------|-------------------------------------|-------|------------------------------------------------------------------------------------------------------------------------------------------------|------------|----------|----|
| 59 | 34PV10(2) | <i>X. darwini</i> | Santa Cruz | Granillo Rojo (Baltra-Puerto Ayora) | Humid | <i>Scalesia pedunculata</i> ,<br><i>Anoda acerifolia</i> ,<br><i>Alternanthera</i><br><i>echinocephala</i> , <i>Sida</i><br><i>rhombifolia</i> | 20.02.2010 | KM266524 | 3  |
| 60 | 34PV10(3) | <i>X. darwini</i> | Santa Cruz | Granillo Rojo (Baltra-Puerto Ayora) | Humid | <i>Scalesia pedunculata</i> ,<br><i>Anoda acerifolia</i> ,<br><i>Alternanthera</i><br><i>echinocephala</i> , <i>Sida</i><br><i>rhombifolia</i> | 20.02.2010 | KM266525 | 3  |
| 61 | 34PV10(4) | <i>X. darwini</i> | Santa Cruz | Granillo Rojo (Baltra-Puerto Ayora) | Humid | <i>Scalesia pedunculata</i> ,<br><i>Anoda acerifolia</i> ,<br><i>Alternanthera</i><br><i>echinocephala</i> , <i>Sida</i><br><i>rhombifolia</i> | 20.02.2010 | KM266526 | 3  |
| 62 | 35PV10    | <i>X. darwini</i> | Santa Cruz | Media Luna                          | Humid | <i>Stachytarpheta cayannensis</i>                                                                                                              | 20.02.2010 | KM266527 | 3  |
| 63 | 35PV10(2) | <i>X. darwini</i> | Santa Cruz | Media Luna                          | Humid | <i>Stachytarpheta cayannensis</i>                                                                                                              | 20.02.2010 | KM266528 | 3  |
| 64 | 35PV10(3) | <i>X. darwini</i> | Santa Cruz | Media Luna                          | Humid | <i>Stachytarpheta cayannensis</i>                                                                                                              | 20.02.2010 | KM266529 | 3  |
| 65 | 35PV10(4) | <i>X. darwini</i> | Santa Cruz | Media Luna                          | Humid | <i>Stachytarpheta cayannensis</i>                                                                                                              | 20.02.2010 | KM266530 | 9  |
| 66 | 35PV10(5) | <i>X. darwini</i> | Santa Cruz | Media Luna                          | Humid | <i>Stachytarpheta cayannensis</i>                                                                                                              | 20.02.2010 | KM266531 | 3  |
| 67 | 35PV10(6) | <i>X. darwini</i> | Santa Cruz | Media Luna                          | Humid | <i>Stachytarpheta cayannensis</i>                                                                                                              | 20.02.2010 | KM266532 | 3  |
| 68 | 36PV10    | <i>X. darwini</i> | Santa Cruz | CDF – Scientific path               | Dry   | <i>Lantana peduncularis</i>                                                                                                                    | 20.02.2010 | KM266533 | 3  |
| 69 | 36PV10(2) | <i>X. darwini</i> | Santa Cruz | CDF – Scientific path               | Dry   | <i>Lantana peduncularis</i>                                                                                                                    | 20.02.2010 | KM266534 | 9  |
| 70 | 37PV10    | <i>X. darwini</i> | Santa Cruz | CDF – Scientific path               | Dry   | <i>Tournefortia psilostachya</i>                                                                                                               | 20.02.2010 | KM266535 | 3  |
| 71 | 38PV10    | <i>X. darwini</i> | Santa Cruz | CDF – Scientific path               | Dry   | <i>Cordia leucophlyctis</i>                                                                                                                    | 20.02.2010 | KM266536 | 3  |
| 72 | 114PV11   | <i>X. darwini</i> | Santa Cruz | CDF, Puerto Ayora                   | Dry   | Flying                                                                                                                                         | 09.03.2011 | KM266537 | 3  |
| 73 | 15PV10    | <i>X. darwini</i> | Floreana   | Asilo de la Paz                     | Humid | <i>Senna spinosa?</i>                                                                                                                          | 09.02.2010 | KM266538 | 10 |
| 74 | 16PV10    | <i>X. darwini</i> | Floreana   | Asilo de la Paz                     | Humid | <i>Asclepias curasavica?</i>                                                                                                                   | 09.02.2010 | KM266539 | 3  |
| 75 | 17PV10    | <i>X. darwini</i> | Floreana   | Puerto Velasco Ibarra               | Dry   | <i>Cryptocarpus pyriformis</i>                                                                                                                 | 09.02.2010 | KM266540 | 10 |
| 76 | 18PV10    | <i>X. darwini</i> | Floreana   | Puerto Velasco Ibarra, casa Witmar  | Dry   | <i>Delonis regia</i>                                                                                                                           | 09.02.2010 | KM266541 | 3  |
| 77 | 19PV10    | <i>X. darwini</i> | Floreana   | Puerto Velasco Ibarra, casa Witmar  | Dry   | Flying                                                                                                                                         | 09.02.2010 | KM266542 | 3  |
| 78 | 20PV10    | <i>X. darwini</i> | Floreana   | Puerto Velasco Ibarra, casa Witmar  | Dry   | <i>Parkinsonia aculeata</i>                                                                                                                    | 09.02.2010 | KM266543 | 3  |
| 79 | 9PV12(1)  | <i>X. darwini</i> | Santa Fé   | Bahía de Santa Fé                   | Dry   | <i>Bursera graveolens</i>                                                                                                                      | 16.02.2012 | KM266544 | 4  |
| 80 | 9PV12(2)  | <i>X. darwini</i> | Santa Fé   | Bahía de Santa Fé                   | Dry   | <i>Bursera graveolens</i>                                                                                                                      | 16.02.2012 | KM266545 | 4  |
| 81 | 9PV12(3)  | <i>X. darwini</i> | Santa Fé   | Bahía de Santa Fé                   | Dry   | <i>Bursera graveolens</i>                                                                                                                      | 16.02.2012 | KM266546 | 4  |
| 82 | 9PV12(4)  | <i>X. darwini</i> | Santa Fé   | Bahía de Santa Fé                   | Dry   | <i>Bursera graveolens</i> ,                                                                                                                    | 16.02.2012 | KM266547 | 4  |
| 83 | 9PV12(5)  | <i>X. darwini</i> | Santa Fé   | Bahía de Santa Fé                   | Dry   | <i>Bursera graveolens</i>                                                                                                                      | 16.02.2012 | KM266548 | 4  |
| 84 | 9PV12(6)  | <i>X. darwini</i> | Santa Fé   | Bahía de Santa Fé                   | Dry   | <i>Waltheria ovata</i>                                                                                                                         | 16.02.2012 | KM266549 | 4  |
| 85 | 9PV12(7)  | <i>X. darwini</i> | Santa Fé   | Bahía de Santa Fé                   | Dry   | <i>Waltheria ovata</i>                                                                                                                         | 16.02.2012 | KM266550 | 4  |
| 86 | 9PV12(8)  | <i>X. darwini</i> | Santa Fé   | Bahía de Santa Fé                   | Dry   | <i>Waltheria ovata</i>                                                                                                                         | 16.02.2012 | KM266551 | 4  |
| 87 | 9PV12(9)  | <i>X. darwini</i> | Santa Fé   | Bahía de Santa Fé                   | Dry   | <i>Waltheria ovata</i>                                                                                                                         | 16.02.2012 | KM266552 | 4  |

|     |             |                   |              |                                    |            |                              |            |          |    |
|-----|-------------|-------------------|--------------|------------------------------------|------------|------------------------------|------------|----------|----|
| 88  | 4PV12(1)    | <i>X. darwini</i> | Genovesa     | Touristic landing – 2 light houses | Dry        | <i>Opuntia helleri</i>       | 13.02.2012 | KM266553 | 3  |
| 89  | 4PV12(2)    | <i>X. darwini</i> | Genovesa     | Touristic landing – 2 light houses | Dry        | <i>Opuntia helleri</i>       | 13.02.2012 | KM266554 | 3  |
| 90  | 4PV12(3)    | <i>X. darwini</i> | Genovesa     | Touristic landing – 2 light houses | Dry        | <i>Opuntia helleri</i>       | 13.02.2012 | KM266555 | 3  |
| 91  | 4PV12(4)    | <i>X. darwini</i> | Genovesa     | Touristic landing – 2 light houses | Dry        | <i>Opuntia helleri</i>       | 13.02.2012 | KM266556 | 3  |
| 92  | 4PV12(5)    | <i>X. darwini</i> | Genovesa     | Touristic landing – 2 light houses | Dry        | <i>Opuntia helleri</i>       | 13.02.2012 | KM266557 | 3  |
| 93  | 4PV12(6)    | <i>X. darwini</i> | Genovesa     | Touristic landing – 2 light houses | Dry        | <i>Opuntia helleri</i>       | 13.02.2012 | KM266558 | 3  |
| 94  | 4PV12(7)    | <i>X. darwini</i> | Genovesa     | Touristic landing – 2 light houses | Dry        | <i>Opuntia helleri</i>       | 13.02.2012 | KM266559 | 3  |
| 95  | 8PV12(1)    | <i>X. darwini</i> | Española     | Playa Manzanillo – Station         | Dry        | <i>Waltheria ovata</i>       | 15.02.2012 | KM266560 | 11 |
| 96  | 8PV12(2)    | <i>X. darwini</i> | Española     | Playa Manzanillo – Station         | Dry        | <i>Waltheria ovata</i>       | 15.02.2012 | KM266561 | 11 |
| 97  | 8PV12(3)    | <i>X. darwini</i> | Española     | Playa Manzanillo – Station         | Dry        | <i>Waltheria ovata</i>       | 15.02.2012 | KM266562 | 11 |
| 98  | 8PV12(4)    | <i>X. darwini</i> | Española     | Playa Manzanillo – Station         | Dry        | <i>Waltheria ovata</i>       | 15.02.2012 | KM266563 | 11 |
| 99  | 8PV12(5)    | <i>X. darwini</i> | Española     | Playa Manzanillo – Station         | Dry        | <i>Waltheria ovata</i>       | 15.02.2012 | KM266564 | 11 |
| 100 | 8PV12(6)    | <i>X. darwini</i> | Española     | Playa Manzanillo – Station         | Dry        | <i>Waltheria ovata</i>       | 15.02.2012 | KM266565 | 11 |
| 101 | 8PV12(7)    | <i>X. darwini</i> | Española     | Playa Manzanillo – Station         | Dry        | <i>Waltheria ovata</i>       | 15.02.2012 | KM266566 | 11 |
| 102 | 8PV12(8)    | <i>X. darwini</i> | Española     | Playa Manzanillo – Station         | Dry        | <i>Waltheria ovata</i>       | 15.02.2012 | KM266567 | 11 |
| 103 | 8PV12(9)    | <i>X. darwini</i> | Española     | Playa Manzanillo – Station         | Dry        | <i>Waltheria ovata</i>       | 15.02.2012 | KM266568 | 11 |
| 104 | 8PV12(10)   | <i>X. darwini</i> | Española     | Playa Manzanillo – Station         | Dry        | <i>Waltheria ovata</i>       | 15.02.2012 | KM266569 | 11 |
| 105 | 8PV12(11)   | <i>X. darwini</i> | Española     | Playa Manzanillo – Station         | Dry        | <i>Waltheria ovata</i>       | 15.02.2012 | KM266570 | 11 |
| 106 | 38.1PV10    | <i>X. darwini</i> | S. Cristóbal | Punta Carola                       | Dry        | Flying                       | 02.03.2010 | KM266571 | 11 |
| 107 | 38.2PV10    | <i>X. darwini</i> | S. Cristóbal | Punta Carola                       | Dry        | Flying                       | 03.03.2010 | KM266572 | 11 |
| 108 | 38.3PV10    | <i>X. darwini</i> | S. Cristóbal | Punta Carola                       | Dry        | <i>Passiflora foetida</i>    | 04.03.2010 | KM266573 | 11 |
| 109 | 38.4PV10(1) | <i>X. darwini</i> | S. Cristóbal | El Junco                           | Humid      | Flying                       | 05.03.2010 | KM266574 | 11 |
| 110 | 38.4PV10(2) | <i>X. darwini</i> | S. Cristóbal | El Junco                           | Humid      | <i>Cuphea carthaginensis</i> | 05.03.2010 | KM266575 | 12 |
| 111 | 38.4PV10(3) | <i>X. darwini</i> | S. Cristóbal | El Junco                           | Humid      | <i>Cuphea carthaginensis</i> | 05.03.2010 | KM266576 | 13 |
| 112 | 38.4PV10(4) | <i>X. darwini</i> | S. Cristóbal | El Junco                           | Humid      | <i>Cuphea carthaginensis</i> | 05.03.2010 | KM266577 | 11 |
| 113 | 38.5PV10(1) | <i>X. darwini</i> | S. Cristóbal | El Junco                           | Humid      | <i>Cuphea carthaginensis</i> | 05.03.2010 | KM266578 | 11 |
| 114 | 38.5PV10(2) | <i>X. darwini</i> | S. Cristóbal | El Junco                           | Humid      | <i>Polygonum acuminatum</i>  | 07.03.2010 | KM266579 | 14 |
| 115 | 38.6PV10    | <i>X. darwini</i> | S. Cristóbal | El Junco                           | Humid      | <i>Cuphea carthaginensis</i> | 07.03.2010 | KM266580 | 11 |
| 116 | 38.7PV10(3) | <i>X. darwini</i> | S. Cristóbal | Galapaguera                        | Transition | <i>Clerodendron molle</i>    | 08.03.2010 | KM266581 | 11 |
| 117 | 38.7PV10(4) | <i>X. darwini</i> | S. Cristóbal | Galapaguera                        | Transition | <i>Cuphea carthaginensis</i> | 08.03.2010 | KM266582 | 11 |
| 118 | 38.8PV10(1) | <i>X. darwini</i> | S. Cristóbal | Puerto Baquerizo Moreno            | Dry        | <i>Passiflora foetida</i>    | 09.03.2010 | KM266583 | 12 |
| 119 | 38.8PV10(2) | <i>X. darwini</i> | S. Cristóbal | Puerto Baquerizo Moreno            | Dry        | <i>Passiflora foetida</i>    | 09.03.2010 | KM266584 | 11 |
| 120 | 119PV11(1)  | <i>X. darwini</i> | S. Cristóbal | Punta Carola                       | Dry        | Flying                       | 24.03.2011 | KM266585 | 11 |
